# Supplementary material for: The mycotoxin phomoxanthone A disturbs the form and function of the inner mitochondrial membrane
Source: Springer Nature journal article supplement (doi:10.1038/s41419-018-0312-8), 2018-02-19
Supplement: 41419_2018_312_MOESM2_ESM.pdf [file 41419_2018_312_MOESM2_ESM.pdf]

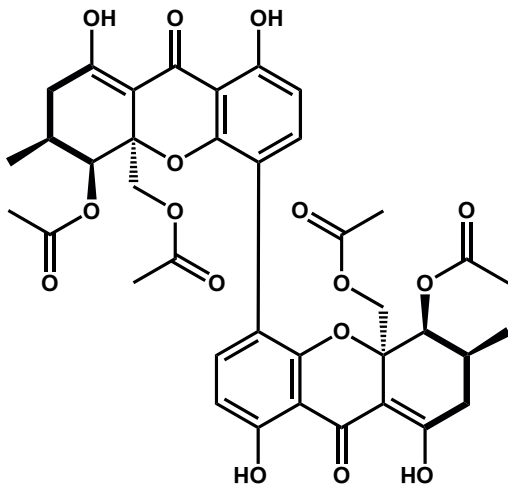

**Figure S1** Structure of phomoxanthone A (PXA), adapted from Rönberg et al. 2013 (PMID 24295452).

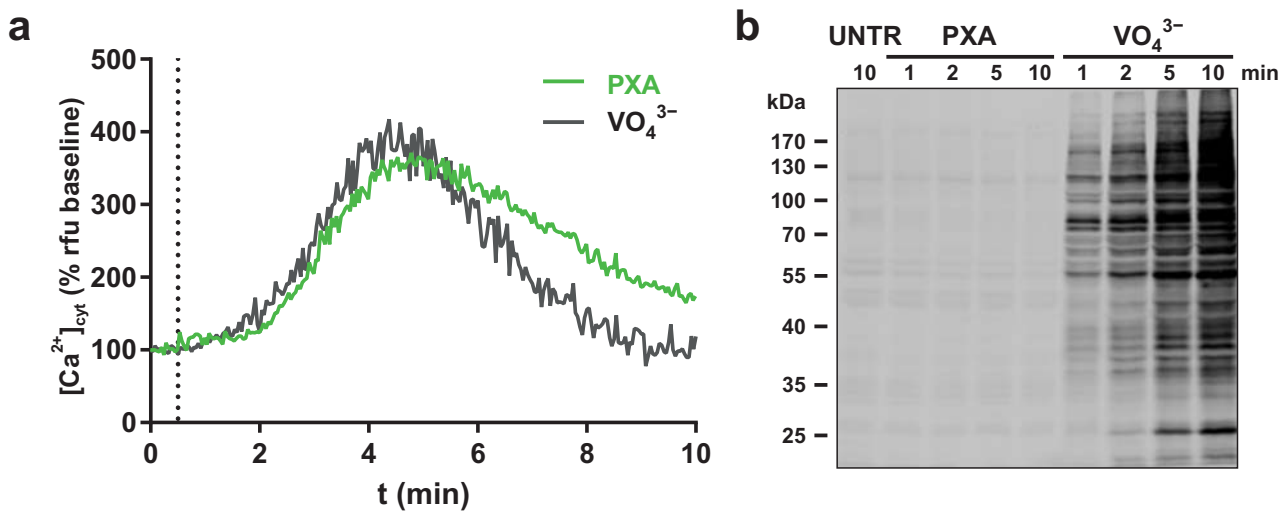

**Figure S2** Comparison of PXA to the tyrosine phosphatase inhibitor pervanadate (VO<sub>4</sub><sup>3-</sup>). **(a)** Induction of Ca<sup>2+</sup> release from intracellular stores in Ramos cells after treatment with either PXA (10 μM) or VO<sub>4</sub><sup>3-</sup> (30 μM). PXA Ca<sup>2+</sup> trace adapted from Figure 1. **(b)** Effect of PXA (10 μM) and VO<sub>4</sub><sup>3-</sup> (30 μM) on tyrosine phosphorylation in Ramos cells as detected by immunoblotting. Untreated cells (UNTR) were used as control.

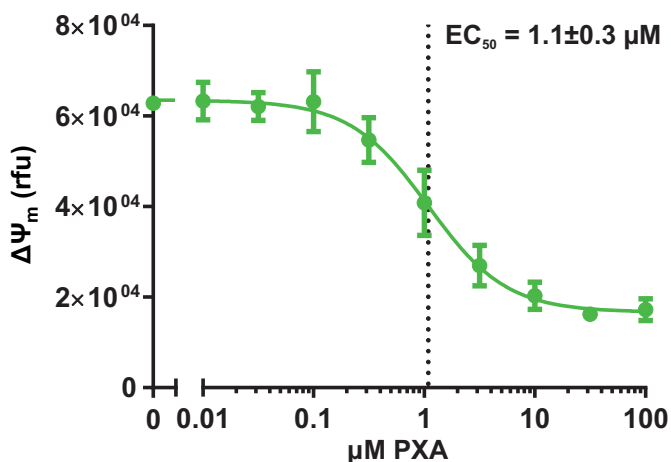

**Figure S3** Titration of PXA to determine the EC<sub>50</sub> for mitochondrial depolarisation (indicated by the dotted line), using the ΔΨ<sub>m</sub>-sensitive fluorescent probe TMRE. Measurement was performed by a microplate reader after 10 min of treatment. Data are the means of three independent experiments; error bars = SD.
