# Supplementary material for: The mycotoxin phomoxanthone A disturbs the form and function of the inner mitochondrial membrane
Source: Springer Nature journal article supplement (doi:10.1038/s41419-018-0312-8), 2018-02-19
Supplement: 41419_2018_312_MOESM3_ESM.pdf [file 41419_2018_312_MOESM3_ESM.pdf]

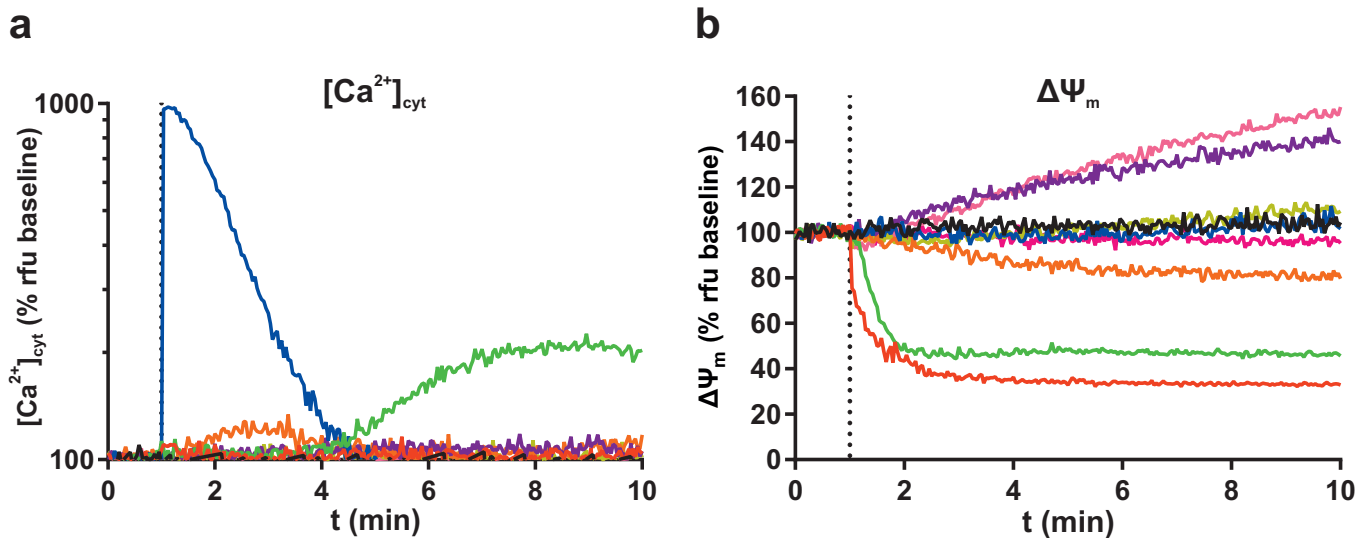

- DMSO
- CCCP
- PXA
- Ionomycin
- Rotenone
- Antimycin
- Oligomycin
- Staurosporine
- $NaN_3$

**Figure S4** Comparison of the effects of PXA and other compounds on  $[Ca^{2+}]_{cyt}$  and  $\Delta\Psi_m$  in Ramos cells. PXA was compared to the protonophore carbonyl cyanide *m*-chlorophenyl hydrazone (CCCP; 10  $\mu$ M); to the  $Ca^{2+}$  ionophore ionomycin (10  $\mu$ M); to the ETC inhibitors rotenone (10  $\mu$ M; complex I), antimycin A (10  $\mu$ M; complex III), azide ( $NaN_3$ ; 1 mM; complex IV), and oligomycin A (10  $\mu$ M; complex V); and to the apoptosis inducer staurosporine (10  $\mu$ M). (a) Effects on  $[Ca^{2+}]_{cyt}$  as measured by flow cytometry using the fluorescent  $Ca^{2+}$ -sensitive dye Fluo-4-AM. All measurements were performed in the absence of extracellular  $Ca^{2+}$  by maintaining the cells in Krebs-Ringer buffer containing 0.5 mM EGTA during measurement. (b) Effects on  $\Delta\Psi_m$  as measured by flow cytometry using the fluorescent  $\Delta\Psi_m$ -sensitive dye TMRE.

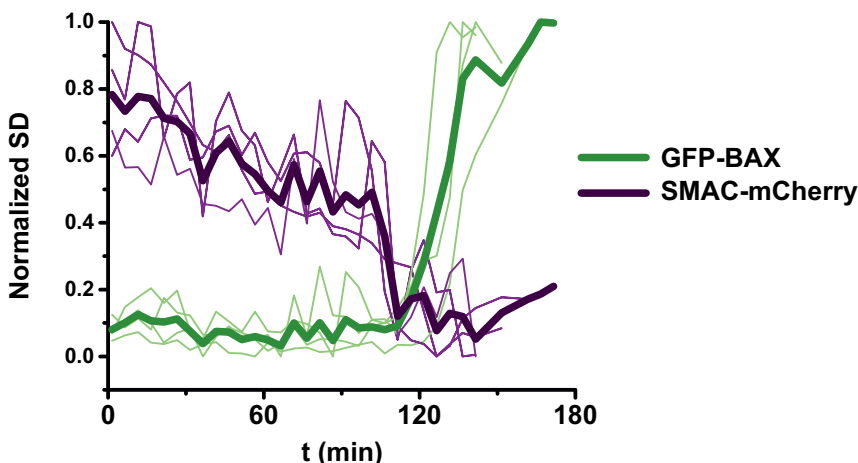

**Figure S5** Quantification of the effects of PXA on mitochondrial BAX accumulation and SMAC release in HCT116 cells. The normalised standard deviation (SD) of the fluorescence intensity of GFP-BAX and SMAC-mCherry upon treatment with PXA (10  $\mu$ M) in individual cells (N=4) was used as a measure of distribution inside the cells. A low SD corresponds to homogenous distribution while a high SD corresponds to accumulation. Thinner lines represent measurements of individual cells, while thicker lines represent the average of all recorded cells.
