# Supplementary material for: The mycotoxin phomoxanthone A disturbs the form and function of the inner mitochondrial membrane
Source: Springer Nature journal article supplement (doi:10.1038/s41419-018-0312-8), 2018-02-19
Supplement: 41419_2018_312_MOESM4_ESM.pdf [file 41419_2018_312_MOESM4_ESM.pdf]

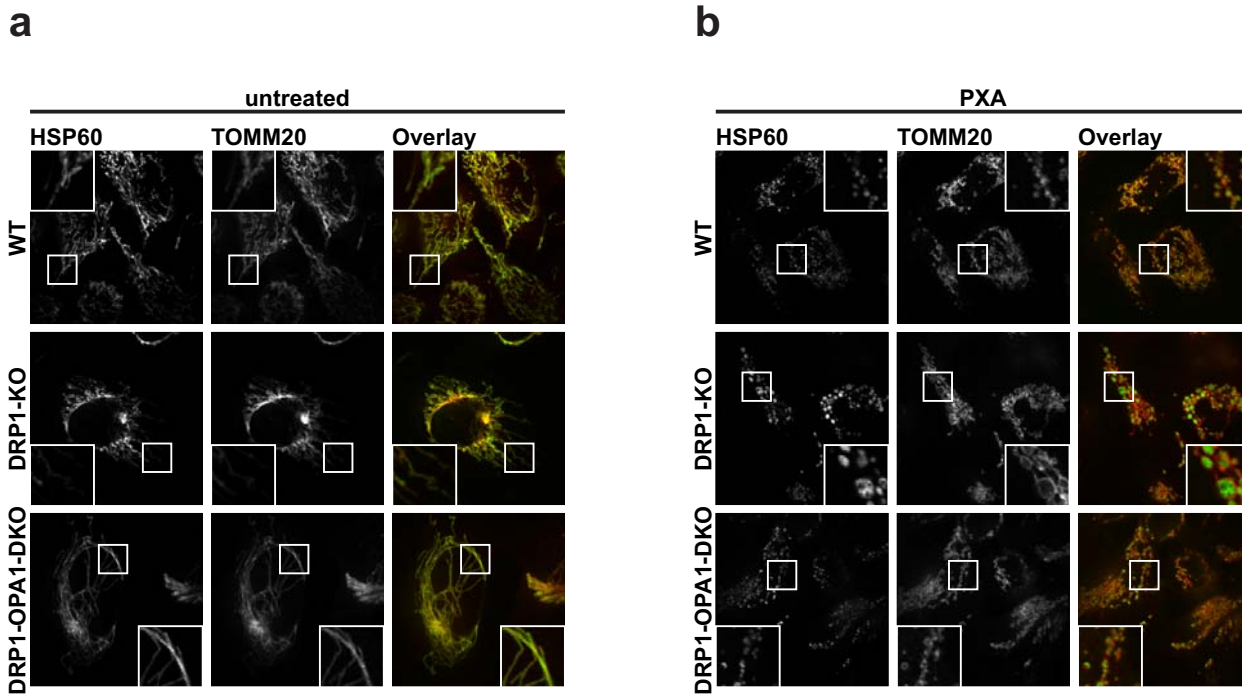

**Figure S6** Confocal images of HeLa cells (WT, DRP1-KO, and DRP1-OPA1-DKO) at 30 min after treatment with either (a) 0.1% v/v DMSO (vehicle control) or (b) 10  $\mu$ M PXA. HSP60 (green) was stained as a marker for the mitochondrial matrix, and TOMM20 (red) was stained as a marker for the outer mitochondrial membrane (OMM).
